# Supplementary material for: ClustAGE: a tool for clustering and distribution analysis of bacterial accessory genomic elements
Source: BMC Bioinformatics. 2018 Apr 20;19:150. doi: 10.1186/s12859-018-2154-x (PMC5910555; doi:10.1186/s12859-018-2154-x)
Supplement: Supplementary file 3 — Unbinned accessory sequences. (XLSX 52 kb) [file 12859_2018_2154_MOESM3_ESM.xlsx]

## Sheet: Sheet1
Supplemental Table 1: Unbinned accessory sequences
Strain	Total accessory genome size, in bp	Unbinned accessory sequence, in bp	Unbinned sequence, %	No. of unbinned sequences	Median size of unbinned sequences, in bp (min - max)
19BR	901031	8184	0.91	145	35 (1-190)
213BR	881346	7475	0.85	138	34.5 (1-190)
B136-33	580033	5038	0.87	100	29.5 (1-195)
DK2	638298	5116	0.8	99	41 (1-163)
LESB58	770579	5401	0.7	107	35 (1-168)
M18	505350	7402	1.46	122	44 (1-183)
NCGM2.S1	916596	6132	0.67	120	31.5 (1-174)
PA14	697997	5780	0.83	113	29 (1-183)
PA7	1176642	22561	1.92	257	91 (1-196)
PACS2	663816	5792	0.87	108	32 (1-195)
PAO1	427616	5658	1.32	114	29.5 (1-181)
RP73	517368	6488	1.25	117	41 (1-169)
PA99	689926	5534	0.8	111	33 (1-168)
PA103	922952	4958	0.54	105	30 (1-167)
Total	10289550	101519	0.99	1756	41 (1-196)
